# Supplementary material for: A Critical Analysis of the Exercise Prescription and Return to Activity Advice That Is Provided in Patient Information Leaflets Following Lumbar Spine Surgery
Source: MDPI journal article supplement (doi:10.3390/medicina55070347), 2019-07-07
Supplement: s1 [file s1]

**Table 1.** Included Hospitals/NHS Trusts.

|    | <b>Hospital</b>                                               | <b>Procedure (s)</b>                                             |
|----|---------------------------------------------------------------|------------------------------------------------------------------|
| 1  | Brighton and Sussex University Hospitals NHS Trust            | Lumbar spinal surgery                                            |
| 2  | Cambridge University Hospitals NHS Foundation Trust           | Lumbar spinal surgery                                            |
| 3  | Derby Teaching Hospitals NHS Foundation Trust                 | Posterior lumbar fusion                                          |
| 4  | Gateshead Health NHS Foundation Trust                         | Lumbar spinal fusion                                             |
| 5  | Guy's and St Thomas' NHS Foundation Trust                     | Anterior and posterior lumbar fusion surgery                     |
| 6  | Guy's and St Thomas' NHS Foundation Trust                     | Primary and revision discectomy                                  |
| 7  | King's College Hospital NHS Foundation Trust                  | Lumbar spinal surgery                                            |
| 8  | Musgrove Park Hospital                                        | Lumbar spinal fusion                                             |
| 9  | Norfolk and Norwich University Hospitals NHS Foundation Trust | Microdiscectomy or decompression                                 |
| 10 | North Bristol NHS Trust                                       | Lumbar spinal fusion                                             |
| 11 | North Bristol NHS Trust                                       | Discectomy, microdiscectomy, spinal decompressions               |
| 12 | Nottingham University Hospitals NHS Trust                     | Lumbar spinal fusion/disc replacement                            |
| 13 | Nottingham University Hospitals NHS Trust                     | Lumbar Spine Decompression/Discectomy                            |
| 14 | Oxford Radcliffe Hospitals NHS Trust                          | Lumbar discectomy, microdiscectomy and decompressive laminectomy |
| 15 | Royal Berkshire NHS Foundation Trust                          | Lumbar spinal fusion                                             |
| 16 | Royal Surrey County Hospital NHS Foundation Trust             | Lumbar spinal surgery                                            |
| 17 | Royal United Hospitals Bath NHS Trust                         | Microdiscectomy/spinal stenosis decompression                    |
| 18 | Salisbury NHS Foundation Trust                                | Lumbar spinal fusion                                             |
| 19 | Salisbury NHS Foundation Trust                                | Discectomy/Decompression                                         |
| 20 | South Tees Hospitals NHS Foundation Trust                     | Lumbar spinal fusion                                             |
| 21 | South Tees Hospitals NHS Foundation Trust                     | Discectomy                                                       |
| 22 | South Tees Hospitals NHS Foundation Trust                     | Decompression                                                    |
| 23 | Southend University Hospital NHS Foundation Trust             | Lumbar spinal surgery                                            |
| 24 | St George's Healthcare NHS Trust                              | Microdiscectomy/laminectomy                                      |
| 25 | The Dudley Group NHS Foundation Trust                         | Microdiscectomy                                                  |
| 26 | The Ipswich Hospital NHS Trust                                | Anterior and posterior lumbar fusion                             |

|    |                                                                   |                          |
|----|-------------------------------------------------------------------|--------------------------|
| 27 | The Royal Liverpool and Broadgreen University Hospitals NHS Trust | Lumbar spinal surgery    |
| 28 | University Hospital of North Staffordshire                        | Discectomy/decompression |
| 29 | University Hospitals Birmingham NHS Foundation Trust              | Discectomy               |
| 30 | West Hertfordshire Hospitals NHS Trust                            | Lumbar spinal fusion     |
| 31 | West Hertfordshire Hospitals NHS Trust                            | Discectomy               |
| 32 | West Hertfordshire Hospitals NHS Trust                            | Decompression            |

Abbreviations: NHS, National Health Service.
